# Supplementary material
Source: PubMed Central journal article supplement (PMC5862738)
Supplement: NIHMS919379-supplement.pdf [file NIHMS919379-supplement.pdf]

## Does Childhood Trauma Moderate Polygenic Risk for Depression? A Meta-analysis of 5,765 Subjects From the Psychiatric Genomics Consortium

### *Supplemental Information*

#### Major Depressive Disorder Working Group of the Psychiatric Genomics Consortium

|                                      |                                   |                                     |
|--------------------------------------|-----------------------------------|-------------------------------------|
| Naomi R Wray* 1, 2                   | Farnush Farhadi Hassan            | Sarah E Medland 28                  |
| Stephan Ripke* 3, 4, 5               | Kiadeh 43                         | Divya Mehta 2, 75                   |
| Manuel Mattheisen* 6, 7, 8, 9        | Hilary K Finucane 44, 45          | Christel M Middeldorp 10, 76, 77    |
| Maciej Trzaskowski* 1                | Andreas J Forstner 35, 36, 46, 47 | Evelin Mihailov 78                  |
| Enda M Byrne 1                       | Josef Frank 48                    | Yuri Milaneschi 19, 19              |
| Abdel Abdellaoui 10                  | H  l  na A Gaspar 27              | Lili Milani 78                      |
| Mark J Adams 11                      | Michael Gill 49                   | Francis M Mondimore 50              |
| Esben Agerbo 9, 12, 13               | Fernando S Goes 50                | Grant W Montgomery 1                |
| Tracy M Air 14                       | Scott D Gordon 51                 | Sara Mostafavi 79, 80               |
| Till F M Andlauer 15, 16             | Jakob Grove 7, 8, 9, 52           | Niamh Mullins 27                    |
| Silviu-Alin Bacanu 17                | Lynsey S Hall 11, 53              | Matthias Nauck 81, 82               |
| Marie B  kvad-Hansen 9, 18           | Christine S  holm Hansen 9, 18    | Bernard Ng 80                       |
| Aartjan T F Beekman 19               | Thomas F Hansen 54, 55, 56        | Michel G Nivard 10                  |
| Tim B Bigdeli 17, 20                 | Stefan Herms 35, 36, 47           | Dale R Nyholt 83                    |
| Elisabeth B Binder 15, 21            | Ian B Hickie 57                   | Paul F O'Reilly 27                  |
| Douglas H R Blackwood 11             | Per Hoffmann 35, 36, 47           | Hogni Oskarsson 84                  |
| Julien Bryois 22                     | Georg Homuth 58                   | Michael J Owen 85                   |
| Henriette N Buttensch  n 8, 9, 23    | Carsten Horn 59                   | Jodie N Painter 28                  |
| Jonas Bybjerg-Grauholm 9, 18         | Jouke-Jan Hottenga 10             | Carsten B  cker Pedersen 9, 12, 13  |
| Na Cai 24, 25                        | David M Hougaard 9, 18            | Marianne Gi  rtz Pedersen 9, 12, 13 |
| Enrique Castelao 26                  | Marcus Ising 60                   | Roseann E. Peterson 17, 86          |
| Jane Hvarregaard Christensen 7, 8, 9 | Rick Jansen 19, 19                | Erik Pettersson 22                  |
| Toni-Kim Clarke 11                   | Eric Jorgenson 61                 | Wouter J Peyrot 19                  |
| Jonathan R I Coleman 27              | James A Knowles 62                | Giorgio Pistis 26                   |
| Luc  a Colodro-Conde 28              | Isaac S Kohane 63, 64, 65         | Danielle Posthuma 87, 88            |
| Baptiste Couvy-Duchesne 29, 30       | Julia Kraft 4                     | Jorge A Quiroz 89                   |
| Nick Craddock 31                     | Warren W. Kretzschmar 66          | Per Qvist 7, 8, 9                   |
| Gregory E Crawford 32, 33            | Jesper Krogh 67                   | John P Rice 90                      |
| Gail Davies 34                       | Zolt  n Kutalik 68, 69            | Brien P. Riley 17                   |
| Ian J Deary 34                       | Yihan Li 66                       | Margarita Rivera 27, 91             |
| Franziska Degenhardt 35, 36          | Penelope A Lind 28                | Saira Saeed Mirza 37                |
| Eske M Derks 28                      | Donald J MacIntyre 70, 71         | Robert Schoevers 92                 |
| Nese Direk 37, 38                    | Dean F MacKinnon 50               | Eva C Schulte 93, 94                |
| Conor V Dolan 10                     | Robert M Maier 2                  | Ling Shen 61                        |
| Erin C Dunn 39, 40, 41               | Wolfgang Maier 72                 | Jianxin Shi 95                      |
| Thalia C Eley 27                     | Jonathan Marchini 73              | Stanley I Shyn 96                   |
| Valentina Escott-Price 42            | Hamdi Mbarek 10                   | Engilbert Sigurdsson 97             |
|                                      | Patrick McGrath 74                |                                     |
|                                      | Peter McGuffin 27                 |                                     |

Grant C B Sinnamon 98  
Johannes H Smit 19  
Daniel J Smith 99  
Hreinn Stefansson 100  
Stacy Steinberg 100  
Fabian Streit 48  
Jana Strohmaier 48  
Katherine E Tansey 101  
Henning Teismann 102  
Alexander Teumer 103  
Wesley Thompson 9, 55, 104, 105  
Pippa A Thomson 106  
Thorgeir E Thorgeirsson 100  
Matthew Traylor 107  
Jens Treutlein 48  
Vassily Trubetskoy 4  
André G Uitterlinden 108  
Daniel Umbricht 109  
Sandra Van der Auwera 110  
Albert M van Hemert 111  
Alexander Viktorin 22  
Peter M Visscher 1, 2  
Yunpeng Wang 9, 55, 105  
Bradley T. Webb 112  
Shantel Marie Weinsheimer 9, 55  
Jürgen Wellmann 102  
Gonneke Willemsen 10  
Stephanie H Witt 48  
Yang Wu 1  
Hualin S Xi 113  
Jian Yang 2, 114  
Futao Zhang 1  
Volker Arolt 115  
Bernhard T Baune 14  
Klaus Berger 102  
Dorret I Boomsma 10  
Sven Cichon 35, 47, 116, 117  
Udo Dannlowski 115  
EJC de Geus 10, 118  
J Raymond DePaulo 50  
Enrico Domenici 119  
Katharina Domschke 120  
Tõnu Esko 5, 78  
Hans J Grabe 110  
Steven P Hamilton 121  
Caroline Hayward 122  
Andrew C Heath 90  
Kenneth S Kendler 17  
Stefan Kloiber 60, 123, 124  
Glyn Lewis 125  
Qingqin S Li 126  
Susanne Lucae 60  
Pamela AF Madden 90  
Patrik K Magnusson 22  
Nicholas G Martin 51  
Andrew M McIntosh 11, 34  
Andres Metspalu 78, 127  
Ole Mors 9, 128  
Preben Bo Mortensen 8, 9, 12, 13  
Bertram Müller-Myhsok 15, 16, 129  
Merete Nordentoft 9, 130  
Markus M Nöthen 35, 36  
Michael C O'Donovan 85  
Sara A Paciga 131  
Nancy L Pedersen 22  
Brenda WJH Penninx 19  
Roy H Perlis 39, 132  
David J Porteous 106  
James B Potash 133  
Martin Preisig 26  
Marcella Rietschel 48  
Catherine Schaefer 61  
Thomas G Schulze 48, 94, 134, 135, 136  
Jordan W Smoller 39, 40, 41  
Kari Stefansson 100, 137  
Henning Tiemeier 37, 138, 139  
Rudolf Uher 140  
Henry Völzke 103  
Myrna M Weissman 74, 141  
Thomas Werge 9, 55, 142  
Cathryn M Lewis\* 27, 143  
Douglas F Levinson\* 144  
Gerome Breen\* 27, 145  
Anders D Børglum\* 7, 8, 9  
Patrick F Sullivan\* 22, 146, 147,

- 1, Institute for Molecular Bioscience, The University of Queensland, Brisbane, QLD, AU
- 2, Queensland Brain Institute, The University of Queensland, Brisbane, QLD, AU
- 3, Analytic and Translational Genetics Unit, Massachusetts General Hospital, Boston, MA, US
- 4, Department of Psychiatry and Psychotherapy, Universitätsmedizin Berlin Campus Charité Mitte, Berlin, DE
- 5, Medical and Population Genetics, Broad Institute, Cambridge, MA, US
- 6, Centre for Psychiatry Research, Department of Clinical Neuroscience, Karolinska Institutet, Stockholm, SE
- 7, Department of Biomedicine, Aarhus University, Aarhus, DK
- 8, iSEQ, Centre for Integrative Sequencing, Aarhus University, Aarhus, DK
- 9, iPSYCH, The Lundbeck Foundation Initiative for Integrative Psychiatric Research, DK
- 10, Dept of Biological Psychology & EMGO+ Institute for Health and Care Research, Vrije Universiteit Amsterdam, Amsterdam, NL
- 11, Division of Psychiatry, University of Edinburgh, Edinburgh, GB
- 12, Centre for Integrated Register-based Research, Aarhus University, Aarhus, DK
- 13, National Centre for Register-Based Research, Aarhus University, Aarhus, DK
- 14, Discipline of Psychiatry, University of Adelaide, Adelaide, SA, AU
- 15, Department of Translational Research in Psychiatry, Max Planck Institute of Psychiatry, Munich, DE
- 16, Munich Cluster for Systems Neurology (SyNergy), Munich, DE
- 17, Department of Psychiatry, Virginia Commonwealth University, Richmond, VA, US
- 18, Center for Neonatal Screening, Department for Congenital Disorders, Statens Serum Institut, Copenhagen, DK
- 19, Department of Psychiatry, Vrije Universiteit Medical Center and GGZ inGeest, Amsterdam, NL
- 20, Virginia Institute for Psychiatric and Behavior Genetics, Richmond, VA, US
- 21, Department of Psychiatry and Behavioral Sciences, Emory University School of Medicine, Atlanta, GA, US
- 22, Department of Medical Epidemiology and Biostatistics, Karolinska Institutet, Stockholm, SE
- 23, Department of Clinical Medicine, Translational Neuropsychiatry Unit, Aarhus University, Aarhus, DK
- 24, Human Genetics, Wellcome Trust Sanger Institute, Cambridge, GB
- 25, Statistical genomics and systems genetics, European Bioinformatics Institute (EMBL-EBI), Cambridge, GB
- 26, Department of Psychiatry, University Hospital of Lausanne, Prilly, Vaud, CH
- 27, MRC Social Genetic and Developmental Psychiatry Centre, King's College London, London, GB
- 28, Genetics and Computational Biology, QIMR Berghofer Medical Research Institute, Herston, QLD, AU
- 29, Centre for Advanced Imaging, The University of Queensland, Saint Lucia, QLD, AU
- 30, Queensland Brain Institute, The University of Queensland, Saint Lucia, QLD, AU
- 31, Psychological Medicine, Cardiff University, Cardiff, GB
- 32, Center for Genomic and Computational Biology, Duke University, Durham, NC, US
- 33, Department of Pediatrics, Division of Medical Genetics, Duke University, Durham, NC, US
- 34, Centre for Cognitive Ageing and Cognitive Epidemiology, University of Edinburgh, Edinburgh, GB
- 35, Institute of Human Genetics, University of Bonn, Bonn, DE
- 36, Life&Brain Center, Department of Genomics, University of Bonn, Bonn, DE
- 37, Epidemiology, Erasmus MC, Rotterdam, Zuid-Holland, NL
- 38, Psychiatry, Dokuz Eylul University School Of Medicine, Izmir, TR
- 39, Department of Psychiatry, Massachusetts General Hospital, Boston, MA, US
- 40, Psychiatric and Neurodevelopmental Genetics Unit (PNGU), Massachusetts General Hospital, Boston, MA, US
- 41, Stanley Center for Psychiatric Research, Broad Institute, Cambridge, MA, US

- 42, Neuroscience and Mental Health, Cardiff University, Cardiff, GB
- 43, Bioinformatics, University of British Columbia, Vancouver, BC, CA
- 44, Department of Epidemiology, Harvard T.H. Chan School of Public Health, Boston, MA, US
- 45, Department of Mathematics, Massachusetts Institute of Technology, Cambridge, MA, US
- 46, Department of Psychiatry (UPK), University of Basel, Basel, CH
- 47, Human Genomics Research Group, Department of Biomedicine, University of Basel, Basel, CH
- 48, Department of Genetic Epidemiology in Psychiatry, Central Institute of Mental Health, Medical Faculty Mannheim, Heidelberg University, Mannheim, Baden-Württemberg, DE
- 49, Department of Psychiatry, Trinity College Dublin, Dublin, IE
- 50, Psychiatry & Behavioral Sciences, Johns Hopkins University, Baltimore, MD, US
- 51, Genetics and Computational Biology, QIMR Berghofer Medical Research Institute, Brisbane, QLD, AU
- 52, Bioinformatics Research Centre, Aarhus University, Aarhus, DK
- 53, Institute of Genetic Medicine, Newcastle University, Newcastle upon Tyne, GB
- 54, Danish Headache Centre, Department of Neurology, Rigshospitalet, Glostrup, DK
- 55, Institute of Biological Psychiatry, Mental Health Center Sct. Hans, Mental Health Services Capital Region of Denmark, Copenhagen, DK
- 56, iPSYCH, The Lundbeck Foundation Initiative for Psychiatric Research, Copenhagen, DK
- 57, Brain and Mind Centre, University of Sydney, Sydney, NSW, AU
- 58, Interfaculty Institute for Genetics and Functional Genomics, Department of Functional Genomics, University Medicine and Ernst Moritz Arndt University Greifswald, Greifswald, Mecklenburg-Vorpommern, DE
- 59, Roche Pharmaceutical Research and Early Development, Pharmaceutical Sciences, Roche Innovation Center Basel, F. Hoffmann-La Roche Ltd, Basel, CH
- 60, Max Planck Institute of Psychiatry, Munich, DE
- 61, Division of Research, Kaiser Permanente Northern California, Oakland, CA, US
- 62, Psychiatry & The Behavioral Sciences, University of Southern California, Los Angeles, CA, US
- 63, Department of Biomedical Informatics, Harvard Medical School, Boston, MA, US
- 64, Department of Medicine, Brigham and Women's Hospital, Boston, MA, US
- 65, Informatics Program, Boston Children's Hospital, Boston, MA, US
- 66, Wellcome Trust Centre for Human Genetics, University of Oxford, Oxford, GB
- 67, Department of Endocrinology at Herlev University Hospital, University of Copenhagen, Copenhagen, DK
- 68, Institute of Social and Preventive Medicine (IUMSP), University Hospital of Lausanne, Lausanne, VD, CH
- 69, Swiss Institute of Bioinformatics, Lausanne, VD, CH
- 70, Division of Psychiatry, Centre for Clinical Brain Sciences, University of Edinburgh, Edinburgh, GB
- 71, Mental Health, NHS 24, Glasgow, GB
- 72, Department of Psychiatry and Psychotherapy, University of Bonn, Bonn, DE
- 73, Statistics, University of Oxford, Oxford, GB
- 74, Psychiatry, Columbia University College of Physicians and Surgeons, New York, NY, US
- 75, School of Psychology and Counseling, Queensland University of Technology, Brisbane, QLD, AU
- 76, Child and Youth Mental Health Service, Children's Health Queensland Hospital and Health Service, South Brisbane, QLD, AU
- 77, Child Health Research Centre, University of Queensland, Brisbane, QLD, AU
- 78, Estonian Genome Center, University of Tartu, Tartu, EE
- 79, Medical Genetics, University of British Columbia, Vancouver, BC, CA
- 80, Statistics, University of British Columbia, Vancouver, BC, CA
- 81, DZHK (German Centre for Cardiovascular Research), Partner Site Greifswald, University Medicine, University Medicine Greifswald, Greifswald, Mecklenburg-Vorpommern, DE

- 82, Institute of Clinical Chemistry and Laboratory Medicine, University Medicine Greifswald, Greifswald, Mecklenburg-Vorpommern, DE
- 83, Institute of Health and Biomedical Innovation, Queensland University of Technology, Brisbane, QLD, AU
- 84, Humus, Reykjavik, IS
- 85, MRC Centre for Neuropsychiatric Genetics and Genomics, Cardiff University, Cardiff, GB
- 86, Virginia Institute for Psychiatric & Behavioral Genetics, Virginia Commonwealth University, Richmond, VA, US
- 87, Clinical Genetics, Vrije Universiteit Medical Center, Amsterdam, NL
- 88, Complex Trait Genetics, Vrije Universiteit Amsterdam, Amsterdam, NL
- 89, Solid Biosciences, Boston, MA, US
- 90, Department of Psychiatry, Washington University in Saint Louis School of Medicine, Saint Louis, MO, US
- 91, Department of Biochemistry and Molecular Biology II, Institute of Neurosciences, Center for Biomedical Research, University of Granada, Granada, ES
- 92, Department of Psychiatry, University of Groningen, University Medical Center Groningen, Groningen, NL
- 93, Department of Psychiatry and Psychotherapy, Medical Center of the University of Munich, Campus Innenstadt, Munich, DE
- 94, Institute of Psychiatric Phenomics and Genomics (IPPG), Medical Center of the University of Munich, Campus Innenstadt, Munich, DE
- 95, Division of Cancer Epidemiology and Genetics, National Cancer Institute, Bethesda, MD, US
- 96, Behavioral Health Services, Kaiser Permanente Washington, Seattle, WA, US
- 97, Faculty of Medicine, Department of Psychiatry, University of Iceland, Reykjavik, IS
- 98, School of Medicine and Dentistry, James Cook University, Townsville, QLD, AU
- 99, Institute of Health and Wellbeing, University of Glasgow, Glasgow, GB
- 100, deCODE Genetics / Amgen, Reykjavik, IS
- 101, College of Biomedical and Life Sciences, Cardiff University, Cardiff, GB
- 102, Institute of Epidemiology and Social Medicine, University of Münster, Münster, Nordrhein-Westfalen, DE
- 103, Institute for Community Medicine, University Medicine Greifswald, Greifswald, Mecklenburg-Vorpommern, DE
- 104, Department of Psychiatry, University of California, San Diego, San Diego, CA, US
- 105, KG Jebsen Centre for Psychosis Research, Norway Division of Mental Health and Addiction, Oslo University Hospital, Oslo, NO
- 106, Medical Genetics Section, CGEM, IGMM, University of Edinburgh, Edinburgh, GB
- 107, Clinical Neurosciences, University of Cambridge, Cambridge, GB
- 108, Internal Medicine, Erasmus MC, Rotterdam, Zuid-Holland, NL
- 109, Roche Pharmaceutical Research and Early Development, Neuroscience, Ophthalmology and Rare Diseases Discovery & Translational Medicine Area, Roche Innovation Center Basel, F. Hoffmann-La Roche Ltd, Basel, CH
- 110, Department of Psychiatry and Psychotherapy, University Medicine Greifswald, Greifswald, Mecklenburg-Vorpommern, DE
- 111, Department of Psychiatry, Leiden University Medical Center, Leiden, NL
- 112, Virginia Institute of Psychiatric & Behavioral Genetics, Virginia Commonwealth University, Richmond, VA, US
- 113, Computational Sciences Center of Emphasis, Pfizer Global Research and Development, Cambridge, MA, US
- 114, Institute for Molecular Bioscience; Queensland Brain Institute, The University of Queensland, Brisbane, QLD, AU
- 115, Department of Psychiatry, University of Münster, Münster, Nordrhein-Westfalen, DE

- 116, Institute of Medical Genetics and Pathology, University Hospital Basel, University of Basel, Basel, CH
- 117, Institute of Neuroscience and Medicine (INM-1), Research Center Juelich, Juelich, DE
- 118, Amsterdam Public Health Institute, Vrije Universiteit Medical Center, Amsterdam, NL
- 119, Centre for Integrative Biology, Università degli Studi di Trento, Trento, Trentino-Alto Adige, IT
- 120, Department of Psychiatry and Psychotherapy, Medical Center, University of Freiburg, Faculty of Medicine, University of Freiburg, Freiburg, DE
- 121, Psychiatry, Kaiser Permanente Northern California, San Francisco, CA, US
- 122, Medical Research Council Human Genetics Unit, Institute of Genetics and Molecular Medicine, University of Edinburgh, Edinburgh, GB
- 123, Department of Psychiatry, University of Toronto, Toronto, ON, CA
- 124, Centre for Addiction and Mental Health, Toronto, ON, CA
- 125, Division of Psychiatry, University College London, London, GB
- 126, Neuroscience Therapeutic Area, Janssen Research and Development, LLC, Titusville, NJ, US
- 127, Institute of Molecular and Cell Biology, University of Tartu, Tartu, EE
- 128, Psychosis Research Unit, Aarhus University Hospital, Risskov, Aarhus, DK
- 129, University of Liverpool, Liverpool, GB
- 130, Mental Health Center Copenhagen, Copenhagen University Hospital, Copenhagen, DK
- 131, Human Genetics and Computational Biomedicine, Pfizer Global Research and Development, Groton, CT, US
- 132, Psychiatry, Harvard Medical School, Boston, MA, US
- 133, Psychiatry, University of Iowa, Iowa City, IA, US
- 134, Department of Psychiatry and Behavioral Sciences, Johns Hopkins University, Baltimore, MD, US
- 135, Department of Psychiatry and Psychotherapy, University Medical Center Göttingen, Goettingen, Niedersachsen, DE
- 136, Human Genetics Branch, NIMH Division of Intramural Research Programs, Bethesda, MD, US
- 137, Faculty of Medicine, University of Iceland, Reykjavik, IS
- 138, Child and Adolescent Psychiatry, Erasmus MC, Rotterdam, Zuid-Holland, NL
- 139, Psychiatry, Erasmus MC, Rotterdam, Zuid-Holland, NL
- 140, Psychiatry, Dalhousie University, Halifax, NS, CA
- 141, Division of Epidemiology, New York State Psychiatric Institute, New York, NY, US
- 142, Department of Clinical Medicine, University of Copenhagen, Copenhagen, DK
- 143, Department of Medical & Molecular Genetics, King's College London, London, GB
- 144, Psychiatry & Behavioral Sciences, Stanford University, Stanford, CA, US
- 145, NIHR BRC for Mental Health, King's College London, London, GB
- 146, Genetics, University of North Carolina at Chapel Hill, Chapel Hill, NC, US
- 147, Psychiatry, University of North Carolina at Chapel Hill, Chapel Hill, NC, US

**Dichotomous Childhood Trauma Questionnaire (CTQ) score**

The CTQ covers the five domains of sexual abuse (SA), physical abuse (PA), emotional abuse (EA), emotional neglect (EN), and physical neglect (PN). Each domain is assessed by five questions (scored 1 to 5) resulting in a domain score ranging from 5 to 25. Per domain, cutoffs were applied to define a narrow definition of childhood trauma separating no or mild trauma from moderate or severe trauma, based on cut-offs for moderate/severe of > 7 (SA), > 9 (PA), > 12 (EA), > 14 (EN), > 9 (PN) respectively. These cut-offs are based on the CTQ manual. From this, an overall dichotomous CTQ indicator was constructed to separate trauma in any of the five domains (1) from trauma in none of the domains (0).

**Childhood trauma in DGN and QIMR**

In the Depression Gene Network (DGN) cohort, sexual abuse was assessed with two questions: “Someone touched parts of your body in a sexual way, or had you touch parts of the person in a sexual way”; and “Someone had or attempted to have oral sex, anal sex, or sexual intercourse with you”. Physical abuse in DGN was also assessed with two questions: “Someone outside your household physically attacked or assaulted you, threatened you with a weapon or held you captive”; and “Your mother, father or another adult household member hurt you on purpose (for example, beat, choked, kicked, cut or burned you)”. The narrow definition was defined as at least one of four questions occurring frequently versus sometimes, rarely or never, and the broad definition as at least one of four questions occurring frequently or sometimes versus rarely or never. For data from the Queensland Institute of Medical Research (QIMR), two instruments were used to assess childhood trauma before the age of 18. Most QIMR individuals were assessed with an instrument covering sexual abuse: touching your sexual parts, you touching their sexual parts, or sexual intercourse (SA assessed with one question for family members and one question for non-family); and physical abuse: being punished by hitting (one question), hurting from punishment next day (one question), being physically injured on purpose (one question). The other QIMR individuals (on the QIMR\_3 genotype-batch labeled as M7) were assessed with a questionnaire covering sexual abuse as the occurrence of: exposure to sexual organs, exposure to masturbation, being touched, attempt to have sex, and have sex (SA specified in 16 separate questions); and for physical abuse the occurrence of: being hit, kicked, choked, throttled or locked in by either father, father-figure, mother, or mother-figure (PA specified in 13 separate questions). For QIMR the narrow and broad definitions were defined as above, except for physical abuse from the second questionnaire (QIMR\_3\_M7) that didn’t distinguish between occurring “frequently” and “sometimes” resulting in converging of the narrow and broad definitions. For the analyses, we applied the broad definition.

**Simulation study 1: impact of gene-environment correlation in tests for GxE-interaction**

Tests of genotype by environment interaction are known to be scale dependent. In a linear regression model, where a continuous phenotype is regressed on a measured genetic variant (e.g. a candidate gene) and a measured exposure, non-normality of the phenotypic distribution can give rise to spurious interaction effects. We considered this issue given logistic regression of a binary phenotype by means of a small simulation study. We generated phenotypic data based on 12 binary symptoms, which were related to an underlying normally distributed depression liability by a Rasch model (1). The parameters of the Rasch model were chosen so that the distribution of the sum scores based on the 12 symptoms was highly skewed. We dichotomized the sum score of these 12 symptoms to arrive at the binary phenotype with a prevalence of .20. The underlying normally distributed depression liability was subject to main effects of genes (A; explaining 38.8% of the liability variance) and the main effects of a given exposure (explaining 11.1%). There was no interaction effect (AxE). We considered the type I error rate  $\alpha$  of the interaction effect, where we regressed the binary phenotype on A, the dichotomized exposure variable (E; prevalence .10) and on the interaction AxE. We set the nominal  $\alpha$  at .05. We varied the correlation between the exposure and the genetic variable. Based on 10,000 replications, we observed an inflated type I error rate of the interaction effect as a function of the correlation between the genetic variable and the exposure. However, this inflation was relatively small. The observed type I error rate was .046 (zero correlation), .056 (correlation .15) and .0752 (correlation .30). Note that .056 and .0752 both deviate significantly from the nominal value of .5 ( $p=.003$  and  $p<.0001$ , respectively). So in this scenario, which is based on the NESDA and Radiant-UK data, we note that we expect some type I error rate inflation. However, we conclude that the type I error rate inflation in test of GxE in the present set-up is small and does not render the test useless. Specifically, in the NESDA and Radiant-UK data the correlation between the genetic variable (polygenic risk score) and the exposure (childhood trauma) is likely to be very low (Table S5).



## Simulation study 2

The aim of this simulation study is to aid interpretation of interaction analyses with polygenic risk score (PRS) by simulating different underlying genetic architectures.

### *Liability threshold model and the impact of childhood trauma (CT) on major depressive disorder (MDD)*

Simulation is based on the liability-threshold model, which can be modeled as MDD underpinned by an unobserved liability,  $l_{MDD}$ , where individuals are affected when liability exceeds disease threshold,  $T_{MDD}$ . The liability is assumed to be normally distributed and scaled to a population mean of 0 and variance of 1 (which defines  $T_{MDD}$  given the prevalence of MDD  $K_{MDD}$ ), and to result from independent normally distributed environmental ( $e_{MDD}$ ) and genetic effects ( $g_{MDD}$ ) with  $l_{MDD} = g_{MDD} + e_{MDD}$ , where  $var(g_{MDD})/var(l_{MDD}) = var(g_{MDD}) = h_{l,MDD}^2$ , the heritability of MDD on the liability scale. Here, we subdivide the environmental effects as  $e_{MDD} = CT_{liability\ scale} + e_{residual,MDD}$ . We assume that  $CT_{observed\ scale}$  is represented by a dichotomous measure that labels individuals as exposed (1) or unexposed (0) with an odd ratio for MDD of exposed of  $OR_{CT}$ . For a prevalence of MDD of  $K_{MDD} = 0.15$ , prevalence of CT of  $K_{CT} = 0.25$  and  $OR_{CT} = 3.2$ , the  $CT_{observed\ scale}$  can be transformed to  $CT_{liability\ scale}$  as  $-0.16$  (unexposed) and  $0.47$  (exposed), and explains 7.4% of variation on the liability scale (Appendix A). Assuming a heritability of MDD of  $h_{l,MDD}^2 = 0.35$ , the variance explained by the residual environmental effects  $e_{residual,MDD}$  follows as 57.6% (assuming that  $CT_{liability\ scale}$ ,  $e_{residual,MDD}$ , and  $g_{MDD}$  are all independent). For Model 1, we consider CT as part of the environmental effects on MDD, but we note that CT has been found to be heritable itself (2); the consequences of which will be discussed later. In Model 1, we will, further, assume that the genetic and residual environmental effects are equal in those exposed and those unexposed to CT, which can thus be thought of as a “pure additive” model on the liability scale of  $CT_{liability\ scale}$ ,  $e_{residual,MDD}$ , and  $g_{MDD}$  (i.e. no GxE-interaction). After describing simulation of SNP data, we will discuss decreasing the correlation of SNP-effects between those exposed and those unexposed to CT (Model 2), increasing a genetic contribution to CT through introducing a heritability for CT (Model 3), increasing magnitude of SNP-effects on MDD in those exposed compared to those unexposed to CT (Model 4), and decreasing magnitude of residual environmental effects on MDD in those exposed compared to those unexposed to CT (Model 5).

### *Simulation of SNP data and genetic effects*

We simulated individuals in a population one-by-one until a total of 9,000 cases and 9,000 controls were obtained, from which 10,000 were used as discovery and 8,000 as target set. Therefore, we

first simulated the SNPs following the method of Golan et al (3), and subsequently modeled CT and MDD. Briefly, the properties of 10,000 SNPs in full linkage equilibrium were first defined by drawing their minor allele frequencies (MAF) from the uniform distribution from 0.05 to 0.5, and a proportion of 30% of these SNPs were set to have an effect on MDD with effects drawn from a normal distribution with variance  $h_{i,MDD}^2/3,000$  while the effects of the other SNPs were set at 0. With these SNP effects, an individual  $i$  was simulated by first drawing its allele count ( $x_{ij}$ ; 0,1 or 2) with probabilities of  $(1 - MAF_j)^2$ ,  $2(1 - MAF_j)MAF_j$ , and  $MAF_j^2$  respectively for all SNP  $j$ , and, second, defining its genetic effects as  $g(i)_{MDD} = \sum_j effect_j(x_{ij} - 2MAF_j)/(2(1 - MAF_j)MAF_j)$ . Childhood trauma status of individual  $i$  was assigned with probability  $K_{CT}$ , and transformed to the liability scale  $CT(i)_{liability\ scale}$  as described in Appendix A. The residual environmental effect  $e(i)_{residual,MDD}$  was drawn from a normal distribution with variance  $1 - h_{i,MDD}^2 - var(CT_{liability\ scale})$ , so that the liability of individual  $i$  followed as  $l(i) = g(i)_{MDD} + CT(i)_{liability\ scale} + e(i)_{residual,MDD}$ . Individual  $i$  was deemed affected with MDD when  $l(i) > T_{MDD}$  and non affected otherwise, where disease threshold  $T_{MDD}$  was defined such that  $K_{MDD} = P(z > T_{MDD} | z \sim N(0,1))$ . This procedure was repeated until a total of 9,000 cases and 9,000 controls were obtained. Subsequently, a genome-wide association study (GWAS) was conducted with PLINK on 5,000 cases and 5,000 controls (4), the results of which were used to prepare polygenic risk scores in the target set of the other 4,000 cases and 4,000 controls. For every parameterization, the simulation was repeated 10 times.

#### Simulation - Model 1

For the base assumption of the genetic architecture we assumed a prevalence of MDD of  $K_{MDD} = 0.15$ , a heritability of MDD of  $h_{i,MDD}^2 = 0.35$ , a prevalence of CT of  $K_{CT} = 0.25$ , no impact of SNPs in CT ( $h_{i,CT}^2 = 0$ ), and odds ratio for MDD in those exposed to childhood trauma of  $OR = 3.2$ , and pure additivity on the liability scale (identical genetic and residual environmental effects in those exposed and those unexposed to childhood trauma).

#### Simulation - Model 2

A clear case of GxE interaction would be when the individual SNP-effects on MDD in those exposed would differ from the effects in those unexposed, i.e. when

$r_g = cor(effect_{SNP\ j | CT=1}, effect_{SNP\ j | CT=0}) = 0$  for the 3,000 effective SNPs. To model this scenario, we further assumed that the effects are on the same 3,000 SNPs and the variance explained is constant, that is  $var(effect_{SNP\ j | CT=1}) = var(effect_{SNP\ j | CT=0}) = 0.35$ .

### Simulation - Model 3

For the Models 1, 2, 4 and 5 we have assumed that CT is purely environmental, but heritability of childhood trauma has been estimated at around 0.5 (2). Therefore, an impact of SNPs effects on CT is considered here. For this, we assume that CT is a “disease trait” itself with underlying liability as described above for MDD (not suggesting that children are to blame for the trauma they experience, rather we hypothesize that heritability arises from transmitted alleles that affect personality characteristics in parents). Nevertheless, we drew SNP-effects for CT from a random normal distribution with variance  $h_{l,CT}^2 = 0.5$  and environmental effects from a normal distribution with variance  $1 - h_{l,CT}^2$  to construct a liability of CT  $l_{CT}$ , and individuals were deemed exposed to CT when  $l_{CT}(i) > T_{CT}$  with the threshold defined such that  $K_{CT} = P(z > T_{CT} | z \sim N(0,1))$ . The effects were assigned to the same 3,000 SNPs impacting MDD, but drawn from an independent normal distribution. Given the CT status thus simulated, MDD was derived as described above.

### Simulation - Model 4

Another way to think about GxE interaction is that environmental stress might potentiate genetic effects. This was modeled by setting a proportion of genetic effects on MDD in those exposed to those unexposed to CT as  $var(effect_{SNP j | CT=1})/var(effect_{SNP j | CT=0}) = 3$  while keeping  $cor(effect_{SNP j | CT=1}, effect_{SNP j | CT=0}) = 1$ . The variances of SNP-effects were chosen in such way that the variance of genetic effects in the full population were fixed at 0.35, while the residual environmental effects had the same variance in those exposed and those unexposed to CT (Appendix B).

### Simulation - Model 5

A hypothetical scenario could be that environmental risk factors for MDD (such as socioeconomic status and life-stress in adulthood) cluster in those exposed to CT; the link between these environmental risk factors would be captured in estimates of the OR of CT, but could in addition result in less residual environmental variation in those exposed compared to those unexposed to childhood trauma. We modeled this as  $var(e_{residual,MDD|CT=1})/var(e_{residual,MDD|CT=0}) = 1/3$  while assuming constant genetic effects in those exposed and those unexposed to CT,  $effect_{SNP j | CT=1} = effect_{SNP j | CT=0}$  (Appendix C).

### Appendix A. Transformation of OR to liability scale

To transform the OR from CT on MDD to the liability scale the approach of Witte et al was applied (5). Therefore, the OR (set at 3.2) was first transformed to the RR (2.6) and consequently to the risk

on MDD in exposed ( $CT = 1$  with MDD proportion 0.28) and unexposed ( $CT = 0$  with MDD in proportion 0.11) assuming a population prevalence of  $K_{MDD} = 0.15$  and  $K_{CT} = 0.25$ . The liability disease threshold for MDD in the full population was found as  $T_{MDD,full\ population} = \Phi^{-1}(1 - K_{MDD}) = \Phi^{-1}(1 - 0.15) = 1.0364$ . First assuming a liability variance of 1 in both exposed and unexposed, the threshold in exposed was found as  $T_{MDD|CT=1} = \Phi^{-1}(1 - 0.28) = 0.589$  and in unexposed as  $T_{MDD|CT=0} = \Phi^{-1}(1 - 0.11) = 1.241$ . In line with Witte et al, the mean liability in exposed was found at  $\mu_{l|CT=1} = T_{MDD,full\ population} - T_{MDD|CT=1}$  and in unexposed at  $\mu_{l|CT=0} = T_{MDD,full\ population} - T_{MDD|CT=0}$ , allowing to merge exposed and unexposed while ensuring the disease risks of 0.28 and 0.11 respectively. However, because the variance in both exposed and unexposed was assumed to equal 1, the merged sample had a variance larger than 1 introduced by the variance of CT and a mean slightly different from zero. To ease modeling of genetic effects, we rescaled to mean of zero and variance one, also correcting the disease threshold in this manner. With this, a model was derived transposing CT status of exposed and unexposed to the liability scale, while the overall variance of liability was set at 1, and mean at 0, as usual.

#### Appendix B. Modeling increased magnitude of SNP-effects in $CT=1$ compared to $CT=0$

When aiming to model increased variance of SNP effects in those exposed compared to those unexposed to CT, arbitrary choices have to be made about the residual environmental effects in exposed and unexposed, and the variance of liability, genetic effects and environmental effects in the overall population. We choose to fix the full population variance of liability at 1, variance of genetic effects at  $h_{l,MDD}^2 = 0.35$ , and variance of environmental effects at  $1 - h_{l,MDD}^2 = 0.65$  (the latter including both the variance of  $CT_{liability}$  as well as residual environmental effects). To obtain e.g. a variance of genetic effects in exposed three times the variance of genetic effects in unexposed ( $var(effect_{SNP\ j|CT=1})/var(effect_{SNP\ j|CT=0}) = 3$ ), the variance of genetic effects followed as  $var(effect_{SNP\ j|CT=1}) = 0.56$  and  $var(effect_{SNP\ j|CT=0}) = 0.28$  thereby ensuring that the variance of genetic effect in the full population equals  $var(effect_{SNP\ j}) = 0.25\mu_{effect_{SNP\ j|CT=1}}^2 + 0.75\mu_{effect_{SNP\ j|CT=0}}^2 - (0.2\mu_{effect_{SNP\ j|CT=1}} + 0.8\mu_{effect_{SNP\ j|CT=0}})^2 = 0.25(0.56 + 0^2) + 0.75(0.28 + 0^2) - 0 = 0.35$ . We choose to fix the residual variance in both exposed and unexposed first at  $var(e_{residual|CT=1}) = var(e_{residual|CT=0}) = 0.65$ , and the overall variance of liability was thus larger in exposed than in unexposed. As a result, the sums in Appendix A were slightly adjusted as the variance and mean of the merged sample differed slightly to the above, and therefore correction to obtain variance of 1 and mean of zero in the full population also differed.

*Appendix C. Decreased environmental variation in individuals exposed to CT*

When aiming to model a smaller variance of residual environmental effects in those exposed compared to those unexposed to CT, several model choices have again to be made. We chose to fix the full population variance of liability at 1, variance of genetic effects at  $h_{l,MDD}^2 = 0.35$  equal in exposed and unexposed, and variance of environmental effects at  $1 - h_{l,MDD}^2 = 0.35$  (the latter including both the variance of  $CT_{liability}$  as well as residual environmental effects).

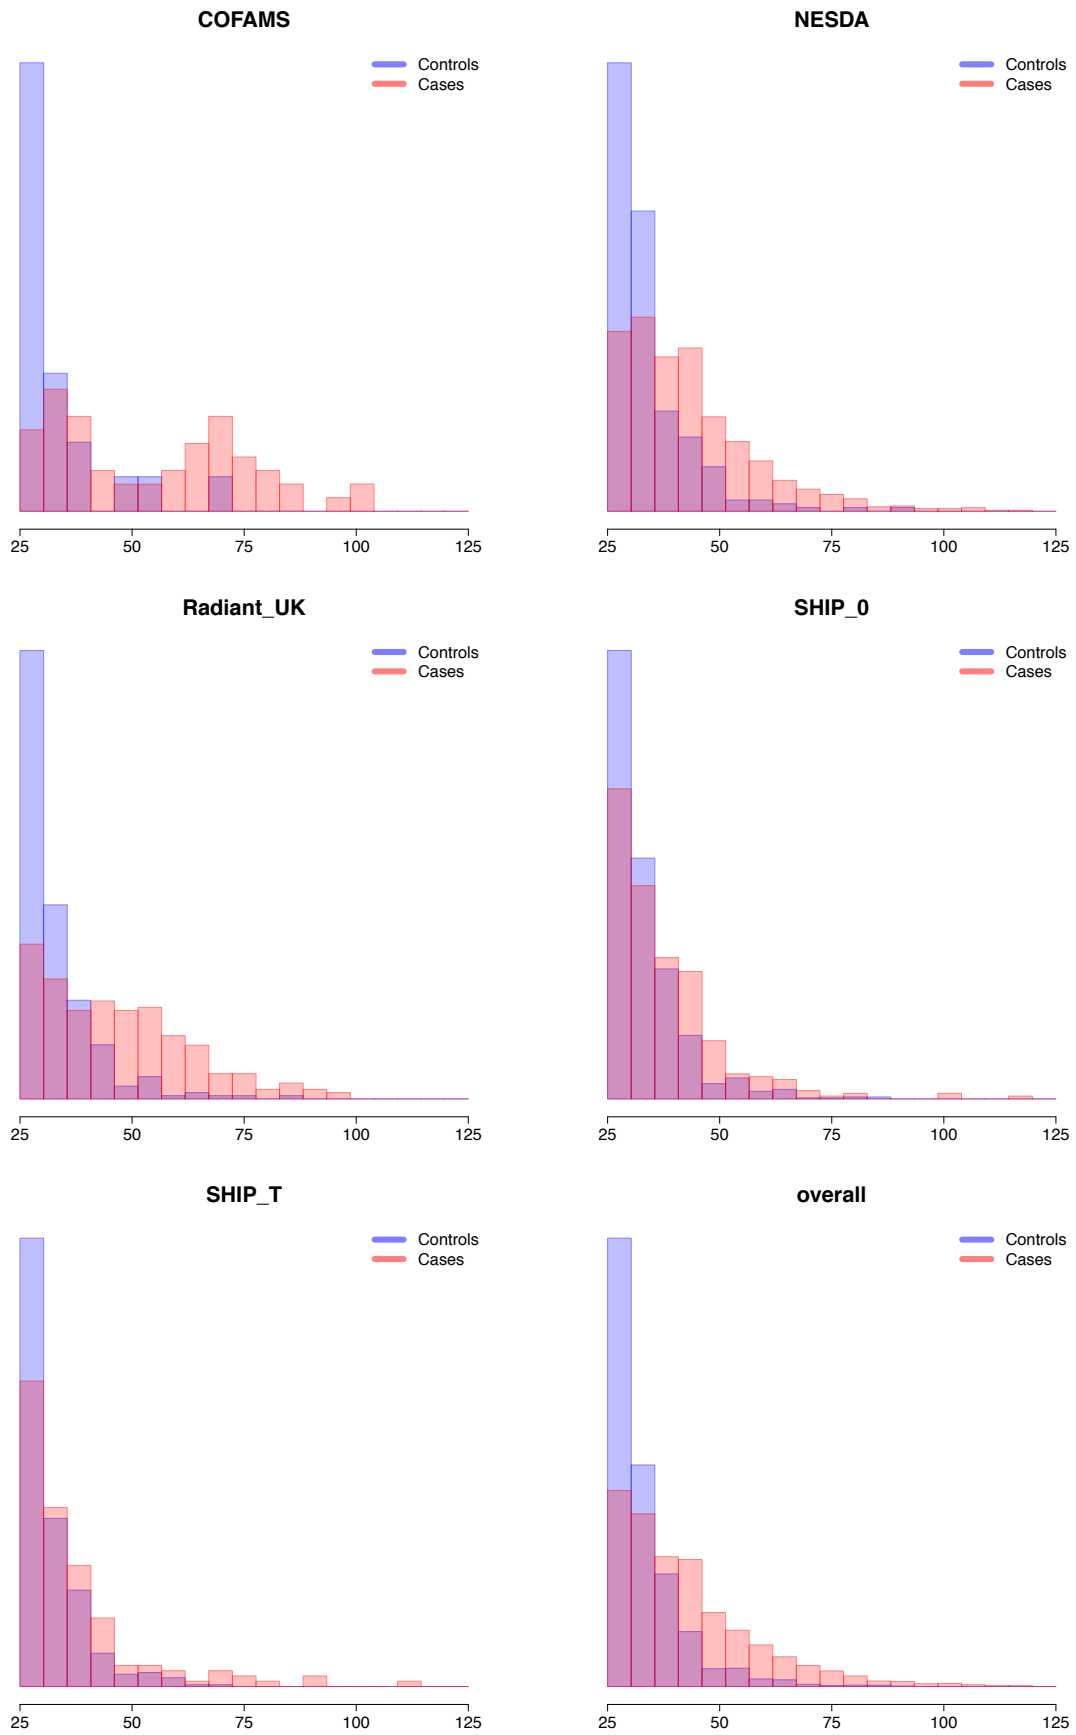

**Figure S1.** Distribution of the 5-domain continuous childhood trauma measure

**Table S1.** Demographic information for contributing cohorts of major depressive disorder cases and unaffected controls

| Cohort               | Country     | N     |          | N with CT information |          | Demographics |          |
|----------------------|-------------|-------|----------|-----------------------|----------|--------------|----------|
|                      |             | Cases | Controls | Cases                 | Controls | Mean age     | % female |
| COFAMS               | Australia   | 120   | 126      | 56                    | 22       | 38.2         | 0.59     |
| DGN                  | USA         | 463   | 459      | 461                   | 458      | -            | 0.70     |
| NESDA                | Netherlands | 1493  | 1603     | 1133                  | 271      | 42.9         | 0.67     |
| QIMR (3 sub cohorts) | Australia   | 1902  | 1660     | 613                   | 237      | 36.3         | 0.64     |
| RADIANT UK           | UK          | 1859  | 1519     | 262                   | 264      | 46.0         | 0.66     |
| SHIP (2 sub cohorts) | Germany     | 515   | 1529     | 499                   | 1490     | 53.6         | 0.50     |

CT=childhood trauma

**Table S2.** Correlation of childhood trauma domains (N=3850)

|                                                                       | EA    | PA    | SA    | EN    | PN    | SUM   |
|-----------------------------------------------------------------------|-------|-------|-------|-------|-------|-------|
| <i>Childhood Trauma Questionnaire subscales (continuous measures)</i> |       |       |       |       |       |       |
| Emotional Abuse (EA)                                                  | 1     | 0.596 | 0.387 | 0.609 | 0.481 | 0.803 |
| Physical Abuse (PA)                                                   | 0.596 | 1     | 0.387 | 0.413 | 0.410 | 0.681 |
| Sexual Abuse (SA)                                                     | 0.387 | 0.387 | 1     | 0.246 | 0.285 | 0.539 |
| Emotional Neglect (EN)                                                | 0.609 | 0.413 | 0.246 | 1     | 0.632 | 0.805 |
| Physical Neglect (PN)                                                 | 0.481 | 0.410 | 0.285 | 0.632 | 1     | 0.728 |
| Sum score (SUM)                                                       | 0.803 | 0.681 | 0.539 | 0.805 | 0.728 | 1     |
| <i>Dichotomous indicator of sexual or physical abuse</i>              |       |       |       |       |       |       |
| SA/PA (dichotomous)                                                   | 0.367 | 0.542 | 0.754 | 0.203 | 0.201 | 0.497 |

The Pearson correlation coefficients (all  $p$ -value <  $2e-16$ ) are displayed between the five domains of the Childhood Trauma Questionnaire (CTQ) by applying the residuals of linear regression of the domains on sex and cohort (COFAMS, NESDA, Radiant-UK, SHIP). It can be seen that sexual abuse is slightly less correlated than the other domains, and that there seems no clear distinction between the abuse and neglect domains. In addition, the Spearman's rho correlation coefficient is displayed of the CTQ domains with the dichotomous indicator of sexual abuse and/or physical abuse (SA/PA) that was available for two additional cohorts.

**Table S3.** Number of overlapping SNPs between cohorts for GRM-based analyses

|         | COFAMS  | DGN       | NESDA   | QIMR_3  | QIMR_6    | QIMR_C  | RAD. UK   | SHIP-0  | SHIP-T    |
|---------|---------|-----------|---------|---------|-----------|---------|-----------|---------|-----------|
| COFAMS  | 771,120 | -         | -       | -       | -         | -       | -         | -       | -         |
| DGN     | 741,245 | 1,051,603 | -       | -       | -         | -       | -         | -       | -         |
| NESDA   | 675,669 | 851,244   | 924,741 | -       | -         | -       | -         | -       | -         |
| QIMR_3  | 626,026 | 775,291   | 702,250 | 821,960 | -         | -       | -         | -       | -         |
| QIMR_6  | 716,604 | 930,576   | 822,954 | 803,446 | 1,000,453 | -       | -         | -       | -         |
| QIMR_C  | 711,902 | 746,328   | 683,496 | 635,209 | 724,195   | 772,404 | -         | -       | -         |
| RAD. UK | 729,795 | 954,007   | 840,621 | 811,506 | 983,793   | 736,767 | 1,028,612 | -       | -         |
| SHIP-0  | 706,975 | 905,732   | 907,329 | 737,015 | 871,372   | 713,690 | 890,930   | 992,050 | -         |
| SHIP-T  | 762,091 | 1,037,269 | 903,725 | 809,699 | 981,370   | 765,093 | 1,008,254 | 967,781 | 1,131,800 |

**Table S4.** Impact of CTQ subdomain continuous measures on MDD

| Subset                   | Mean (SD)   |            | OR (p-value)   |
|--------------------------|-------------|------------|----------------|
|                          | Cases       | Controls   |                |
| <b>Emotional Abuse</b>   |             |            |                |
| Male & Female            | 9.3 (4.8)   | 6.2 (2.3)  | 2.40 (1.1e-06) |
| Male                     | 8.5 (4.2)   | 6.0 (2.0)  | 2.01 (7.1e-05) |
| Female                   | 9.6 (5.0)   | 6.3 (2.5)  | 2.46 (2.1e-07) |
| <b>Physical Abuse</b>    |             |            |                |
| Male & Female            | 6.3 (2.8)   | 5.6 (1.6)  | 1.51 (4.6e-05) |
| Male                     | 6.3 (2.6)   | 5.7 (1.6)  | 1.41 (1.1e-04) |
| Female                   | 6.2 (2.9)   | 5.5 (1.5)  | 1.51 (8.8e-05) |
| <b>Sexual Abuse</b>      |             |            |                |
| Male & Female            | 6.3 (3.4)   | 5.2 (1.3)  | 1.64 (1.6e-03) |
| Male                     | 5.8 (2.3)   | 5.1 (0.9)  | 1.25 (3.4e-03) |
| Female                   | 6.5 (3.8)   | 5.3 (1.7)  | 1.95 (2.9e-03) |
| <b>Emotional Neglect</b> |             |            |                |
| Male & Female            | 12.6 (5.4)  | 8.9 (4.0)  | 2.08 (8.4e-06) |
| Male                     | 12.6 (5.2)  | 9.2 (4.1)  | 1.87 (2.8e-04) |
| Female                   | 12.5 (5.4)  | 8.6 (3.9)  | 2.14 (4.7e-06) |
| <b>Physical Neglect</b>  |             |            |                |
| Male & Female            | 7.8 (3.0)   | 6.8 (2.4)  | 1.75 (8.4e-05) |
| Male                     | 7.9 (2.9)   | 7.0 (2.5)  | 1.54 (2.9e-04) |
| Female                   | 7.8 (3.1)   | 6.6 (2.3)  | 1.79 (9.3e-04) |
| <b>Overall CTQ score</b> |             |            |                |
| Male & Female            | 42.4 (15.1) | 32.7 (8.4) | 2.62 (1.4e-05) |
| Male                     | 41.3 (13.4) | 33.0 (8.2) | 2.18 (1.1e-04) |
| Female                   | 42.8 (15.8) | 32.3 (8.6) | 2.74 (3.6e-05) |

CTQ = Childhood Trauma Questionnaire; MDD = major depressive disorder; OR = odds ratio; SD = standard deviation



**Table S5.** Impact of polygenic risk score (based on MDD discovery  $p < 1$ ) on childhood trauma (i.e. gene-environment correlation)

| Cohort                                                                       | N    |      | Impact of PRS on CT in |         |           |       |              |       | Approximation of full population<br>by 100 times sampling<br>case/control=0.15/0.85 |       |             |       |
|------------------------------------------------------------------------------|------|------|------------------------|---------|-----------|-------|--------------|-------|-------------------------------------------------------------------------------------|-------|-------------|-------|
|                                                                              |      |      | All                    |         | Case only |       | Control only |       | Beta of regression                                                                  |       | Correlation |       |
|                                                                              |      |      | Case                   | Control | Beta      | P     | Beta         | P     | Beta                                                                                | P     | Mean        | SE    |
| Continuous CTQ measure covering five domains (linear regression)             |      |      |                        |         |           |       |              |       |                                                                                     |       |             |       |
| COFAMS                                                                       | 56   | 22   | 1.68                   | 0.507   | -0.52     | 0.871 | 2.03         | 0.426 | -                                                                                   | -     | -           | -     |
| NESDA                                                                        | 1143 | 272  | 1.10                   | 0.004   | 1.03      | 0.020 | -0.19        | 0.742 | 0.21                                                                                | 0.040 | 0.02        | 0.003 |
| RADIANT UK                                                                   | 269  | 267  | 1.34                   | 0.041   | -0.51     | 0.640 | 0.01         | 0.988 | 0.68                                                                                | 0.033 | 0.06        | 0.003 |
| SHIP-0                                                                       | 340  | 993  | 0.15                   | 0.580   | -0.08     | 0.905 | -0.08        | 0.761 | 0.07                                                                                | 0.009 | 0.01        | 0.001 |
| SHIP-TREND                                                                   | 149  | 448  | 1.17                   | 0.004   | 3.21      | 0.007 | 0.15         | 0.682 | 0.79                                                                                | 0.018 | 0.09        | 0.002 |
| Total                                                                        | 1957 | 2002 | 0.84                   | 0.004   | 0.76      | 0.186 | -0.01        | 0.975 | 0.37                                                                                | 0.010 | 0.04        | 0.001 |
| Dichotomous measure covering sexual and physical abuse (logistic regression) |      |      |                        |         |           |       |              |       |                                                                                     |       |             |       |
| COFAMS                                                                       | 56   | 22   | -0.04                  | 0.859   | -0.37     | 0.233 | 0.71         | 0.269 | -                                                                                   | -     | -           | -     |
| DGN                                                                          | 461  | 458  | 0.11                   | 0.143   | 0.11      | 0.256 | -0.02        | 0.866 | 0.04                                                                                | 0.005 | 0.03        | 0.002 |
| NESDA                                                                        | 1133 | 271  | 0.16                   | 0.010   | 0.13      | 0.048 | 0.03         | 0.876 | 0.13                                                                                | 0.009 | 0.02        | 0.003 |
| QIMR_3                                                                       | 186  | 55   | 0.10                   | 0.462   | 0.02      | 0.876 | 0.36         | 0.266 | -                                                                                   | -     | -           | -     |
| QIMR_3_M7                                                                    | 126  | 29   | 0.14                   | 0.423   | 0.13      | 0.505 | 0.20         | 0.672 | -                                                                                   | -     | -           | -     |
| QIMR_6                                                                       | 121  | 107  | -0.10                  | 0.547   | -0.21     | 0.358 | 0.11         | 0.670 | 0.03                                                                                | 0.007 | -0.04       | 0.004 |
| QIMR_C                                                                       | 180  | 46   | -0.06                  | 0.675   | -0.07     | 0.656 | 0.01         | 0.972 | -                                                                                   | -     | -           | -     |
| RADIANT UK                                                                   | 262  | 263  | 0.16                   | 0.119   | 0.02      | 0.912 | 0.01         | 0.963 | 0.11                                                                                | 0.007 | 0.03        | 0.003 |
| SHIP-0                                                                       | 352  | 1042 | 0.09                   | 0.240   | -0.04     | 0.781 | 0.10         | 0.290 | 0.10                                                                                | 0.003 | 0.03        | 0.001 |
| SHIP-TREND                                                                   | 147  | 448  | 0.22                   | 0.105   | 0.26      | 0.235 | 0.12         | 0.500 | 0.19                                                                                | 0.005 | 0.02        | 0.001 |
| Total                                                                        | 3024 | 2741 | 0.11                   | 5.4e-04 | 0.07      | 0.108 | 0.07         | 0.197 | 0.10                                                                                | 0.002 | 0.02        | 0.001 |

The impact of the polygenic risk scores (PRS) (based on major depressive disorder [MDD] discovery results  $p < 1$ ) on childhood trauma (CT) is displayed in all individuals, MDD cases only and controls only for the continuous Childhood Trauma Questionnaire (CTQ) measure covering five domains (applied in main Table 2) and the dichotomous measure covering sexual and/or physical abuse (applied in main Table 3). However, the potential bias of gene-environment correlation in gene-environment interaction analyses depends on the correlation in the full population. Therefore, cases were randomly sampled such that cases/controls=0.15/0.85 to mimic results in the full population. Sampling was repeated 100 times, and conducted for those cohorts with more than 100 controls only. The Pearson correlation was estimated for the continuous CTQ measure, and the Spearman correlation for the dichotomous CT measure, and analyses were corrected for sex and three principal components.

**Table S6.** Interaction-analyses for male and female separately with the PRS based on MDD-PRS including all SNPs (discovery  $p < 1$  in the sample of  $N=112,268$ )

| Cohort                                                 | N    |         | Impact on MDD    |         |             |                  |       |
|--------------------------------------------------------|------|---------|------------------|---------|-------------|------------------|-------|
|                                                        |      |         | PRS              |         |             | PRSxCT           |       |
|                                                        | Case | Control | OR               | P       | R2 (SE, %)  | OR               | P     |
| Male & female (i.e. results displayed in main Table 2) |      |         |                  |         |             |                  |       |
| COFAMS                                                 | 56   | 22      | 1.41 (0.82:2.49) | 0.212   | 3.13 (4.61) | 0.38 (0.08:1.74) | 0.201 |
| NESDA                                                  | 1143 | 272     | 1.24 (1.08:1.42) | 0.002   | 1.33 (0.84) | 1.08 (0.83:1.39) | 0.556 |
| Radiant-UK                                             | 269  | 267     | 1.64 (1.35:2.00) | 6.8e-07 | 5.90 (2.19) | 0.93 (0.66:1.31) | 0.670 |
| SHIP-0                                                 | 340  | 993     | 1.30 (1.14:1.48) | 1.0e-04 | 1.81 (0.91) | 1.02 (0.89:1.18) | 0.737 |
| SHIP-T                                                 | 149  | 448     | 1.33 (1.09:1.63) | 0.005   | 2.10 (1.47) | 1.28 (0.96:1.72) | 0.103 |
| ALL                                                    | 1957 | 2002    | 1.34 (1.23:1.47) | 5.1e-11 | 1.71 (0.45) | 1.05 (0.91:1.20) | 0.519 |
| Male only                                              |      |         |                  |         |             |                  |       |
| COFAMS                                                 | 20   | 12      | 1.66 (0.73:4.21) | 0.243   | 5.05 (7.95) | 0.55 (0.06:4.21) | 0.553 |
| NESDA                                                  | 357  | 111     | 1.23 (0.99:1.54) | 0.061   | 1.24 (1.31) | 1.13 (0.75:1.70) | 0.565 |
| Radiant-UK                                             | 73   | 109     | 1.47 (1.06:2.09) | 0.025   | 3.58 (3.01) | 0.84 (0.47:1.52) | 0.561 |
| SHIP-0                                                 | 112  | 562     | 1.36 (1.10:1.68) | 0.005   | 2.59 (1.79) | 1.08 (0.90:1.32) | 0.424 |
| SHIP-T                                                 | 44   | 246     | 1.37 (0.98:1.93) | 0.072   | 2.57 (2.82) | 1.22 (0.83:1.84) | 0.316 |
| ALL                                                    | 606  | 1040    | 1.34 (1.18:1.52) | 8.6e-06 | 1.71 (0.72) | 1.09 (0.91:1.30) | 0.367 |
| Female only                                            |      |         |                  |         |             |                  |       |
| COFAMS                                                 | 36   | 10      | 1.35 (0.65:2.96) | 0.419   | 3.02 (6.29) | 0.66 (0.05:6.75) | 0.689 |
| NESDA                                                  | 786  | 161     | 1.24 (1.04:1.48) | 0.015   | 1.33 (1.08) | 1.09 (0.78:1.48) | 0.609 |
| Radiant-UK                                             | 196  | 158     | 1.72 (1.36:2.20) | 1.0e-05 | 7.20 (2.96) | 1.01 (0.66:1.56) | 0.970 |
| SHIP-0                                                 | 228  | 431     | 1.26 (1.07:1.50) | 0.006   | 1.54 (1.10) | 1.01 (0.82:1.26) | 0.912 |
| SHIP-T                                                 | 105  | 202     | 1.35 (1.05:1.74) | 0.020   | 2.42 (2.00) | 1.36 (0.93:2.21) | 0.161 |
| ALL                                                    | 1351 | 962     | 1.35 (1.21:1.50) | 5.2e-08 | 1.93 (0.63) | 1.07 (0.90:1.27) | 0.459 |

**Table S7.** Interaction-analyses for the separate CT domains with the MDD-PRS including all SNPs (discovery  $p < 1$ )

| CT domain         | N    |         | Impact on MDD    |         |             |                  |       |
|-------------------|------|---------|------------------|---------|-------------|------------------|-------|
|                   |      |         | PRS              |         |             | PRSxCT           |       |
|                   | Case | Control | OR               | P       | R2 (SE, %)  | OR               | P     |
| <b>COFAMS</b>     |      |         |                  |         |             |                  |       |
| Sum               | 56   | 22      | 1.41 (0.82:2.49) | 0.212   | 3.13 (4.61) | 0.38 (0.08:1.74) | 0.201 |
| EA                | 56   | 22      | 1.41 (0.82:2.49) | 0.212   | 3.13 (4.61) | 0.36 (0.07:1.73) | 0.187 |
| PA                | 56   | 22      | 1.41 (0.82:2.49) | 0.212   | 3.13 (4.61) | 0.01 (0.00:1.05) | 0.102 |
| SA                | 56   | 22      | 1.41 (0.82:2.49) | 0.212   | 3.13 (4.61) | 0.36 (0.01:2.07) | 0.369 |
| EN                | 56   | 22      | 1.41 (0.82:2.49) | 0.212   | 3.13 (4.61) | 0.88 (0.30:2.98) | 0.820 |
| PN                | 56   | 22      | 1.41 (0.82:2.49) | 0.212   | 3.13 (4.61) | 0.27 (0.04:1.35) | 0.132 |
| <b>NESDA</b>      |      |         |                  |         |             |                  |       |
| Sum               | 1143 | 272     | 1.24 (1.08:1.42) | 0.002   | 1.33 (0.84) | 1.08 (0.83:1.39) | 0.556 |
| EA                | 1125 | 268     | 1.22 (1.07:1.41) | 0.004   | 1.17 (0.80) | 0.92 (0.72:1.19) | 0.547 |
| PA                | 1134 | 271     | 1.24 (1.08:1.42) | 0.002   | 1.33 (0.84) | 0.89 (0.68:1.15) | 0.388 |
| SA                | 1139 | 272     | 1.24 (1.08:1.42) | 0.002   | 1.33 (0.84) | 0.89 (0.60:1.33) | 0.573 |
| EN                | 1118 | 270     | 1.24 (1.08:1.42) | 0.002   | 1.32 (0.84) | 1.25 (1.04:1.51) | 0.019 |
| PN                | 1125 | 272     | 1.25 (1.09:1.43) | 0.002   | 1.38 (0.86) | 1.01 (0.83:1.23) | 0.909 |
| <b>RADIANT UK</b> |      |         |                  |         |             |                  |       |
| Sum               | 269  | 267     | 1.64 (1.35:2.00) | 6.8e-07 | 5.90 (2.19) | 0.93 (0.66:1.31) | 0.670 |
| EA                | 266  | 267     | 1.64 (1.35:2.01) | 7.4e-07 | 5.89 (2.19) | 0.87 (0.65:1.18) | 0.350 |
| PA                | 263  | 265     | 1.63 (1.34:1.99) | 1.2e-06 | 5.72 (2.17) | 1.05 (0.75:1.50) | 0.771 |
| SA                | 264  | 265     | 1.64 (1.35:2.00) | 9.0e-07 | 5.84 (2.19) | 1.02 (0.73:1.49) | 0.923 |
| EN                | 260  | 266     | 1.64 (1.35:2.01) | 8.8e-07 | 5.89 (2.21) | 0.95 (0.72:1.26) | 0.720 |
| PN                | 261  | 267     | 1.65 (1.36:2.02) | 5.4e-07 | 6.10 (2.24) | 0.99 (0.76:1.29) | 0.935 |
| <b>SHIP-0</b>     |      |         |                  |         |             |                  |       |
| Sum               | 340  | 993     | 1.30 (1.14:1.48) | 1.0e-04 | 1.81 (0.91) | 1.02 (0.89:1.18) | 0.737 |
| EA                | 353  | 1039    | 1.31 (1.15:1.49) | 5.0e-05 | 1.91 (0.92) | 1.02 (0.89:1.17) | 0.795 |
| PA                | 353  | 1048    | 1.31 (1.16:1.50) | 3.4e-05 | 2.00 (0.94) | 1.00 (0.87:1.15) | 0.976 |
| SA                | 354  | 1045    | 1.31 (1.15:1.49) | 5.1e-05 | 1.90 (0.92) | 1.07 (0.95:1.24) | 0.286 |
| EN                | 350  | 1025    | 1.31 (1.16:1.50) | 3.7e-05 | 2.00 (0.94) | 1.05 (0.92:1.20) | 0.497 |
| PN                | 351  | 1030    | 1.30 (1.15:1.48) | 6.0e-05 | 1.89 (0.92) | 1.03 (0.90:1.18) | 0.686 |
| <b>SHIP-TREND</b> |      |         |                  |         |             |                  |       |
| Sum               | 149  | 448     | 1.33 (1.09:1.63) | 0.005   | 2.10 (1.47) | 1.28 (0.96:1.72) | 0.103 |
| EA                | 148  | 446     | 1.33 (1.09:1.63) | 0.005   | 2.06 (1.47) | 1.12 (0.87:1.49) | 0.426 |
| PA                | 146  | 448     | 1.34 (1.09:1.64) | 0.005   | 2.12 (1.49) | 1.09 (0.89:1.42) | 0.463 |
| SA                | 149  | 448     | 1.33 (1.09:1.63) | 0.005   | 2.10 (1.47) | 1.70 (0.77:3.79) | 0.166 |
| EN                | 149  | 441     | 1.34 (1.10:1.64) | 0.005   | 2.14 (1.49) | 1.18 (0.94:1.49) | 0.166 |
| PN                | 147  | 443     | 1.33 (1.09:1.63) | 0.006   | 2.06 (1.47) | 1.30 (1.02:1.70) | 0.044 |
| <b>ALL</b>        |      |         |                  |         |             |                  |       |
| Sum               | 1957 | 2002    | 1.34 (1.23:1.47) | 5.1e-11 | 1.71 (0.45) | 1.05 (0.91:1.20) | 0.519 |
| EA                | 1948 | 2042    | 1.34 (1.22:1.47) | 2.5e-10 | 1.69 (0.44) | 0.96 (0.85:1.09) | 0.545 |
| PA                | 1952 | 2054    | 1.34 (1.24:1.46) | 1.4e-12 | 1.74 (0.45) | 1.00 (0.89:1.12) | 0.947 |
| SA                | 1962 | 2052    | 1.34 (1.23:1.46) | 9.2e-12 | 1.72 (0.45) | 1.05 (0.90:1.21) | 0.551 |
| EN                | 1933 | 2024    | 1.35 (1.24:1.47) | 5.2e-12 | 1.76 (0.46) | 1.11 (1.00:1.22) | 0.043 |
| PN                | 1940 | 2034    | 1.35 (1.23:1.47) | 3.3e-11 | 1.76 (0.45) | 1.05 (0.93:1.19) | 0.441 |

Sum = sumscore of all five CT domains; EA = Emotional abuse; PA = Physical Abuse ; SA = Sexual Abuse ; EN =

Emotional Neglect ; PN = Physical Neglect

**Table S8.** Comparing different discovery samples for MDD

| Cohort                                                                  | Effective N<br>discovery | N target |         | Effect of PRS    |         |             | Effect of CT |         | Effect of PRSxCT |       |
|-------------------------------------------------------------------------|--------------------------|----------|---------|------------------|---------|-------------|--------------|---------|------------------|-------|
|                                                                         |                          | Case     | Control | OR               | P       | R2          | OR           | P       | OR               | P     |
| MDD discovery results from PGC, Decode, Genscot, Gera, iPsych and UKB   |                          |          |         |                  |         |             |              |         |                  |       |
| COFAMS                                                                  | 112,268                  | 56       | 22      | 1.41 (0.82:2.49) | 0.212   | 3.13 (4.61) | 6.25         | 8.0e-04 | 0.38 (0.08:1.74) | 0.201 |
| NESDA                                                                   | 112,268                  | 1143     | 272     | 1.24 (1.08:1.42) | 0.002   | 1.33 (0.84) | 3.29         | 3.7e-21 | 1.08 (0.83:1.39) | 0.556 |
| RADIANT UK                                                              | 112,268                  | 269      | 267     | 1.64 (1.35:2.00) | 6.8e-07 | 5.90 (2.19) | 4.03         | 3.0e-20 | 0.93 (0.66:1.31) | 0.670 |
| SHIP-0                                                                  | 112,268                  | 340      | 993     | 1.30 (1.14:1.48) | 1.0e-04 | 1.81 (0.91) | 1.52         | 7.0e-11 | 1.02 (0.89:1.18) | 0.737 |
| SHIP-TREND                                                              | 112,268                  | 149      | 448     | 1.33 (1.09:1.63) | 0.005   | 2.10 (1.47) | 1.71         | 3.7e-07 | 1.28 (0.96:1.72) | 0.103 |
| Total                                                                   | 112,268                  | 1957     | 2002    | 1.34 (1.23:1.47) | 5.1e-11 | 1.71 (0.45) | 2.53         | 1.3e-09 | 1.05 (0.91:1.20) | 0.519 |
| MDD discovery results from PGC MDD wave 2 leaving the target cohort out |                          |          |         |                  |         |             |              |         |                  |       |
| COFAMS                                                                  | 40,373                   | 56       | 22      | 1.02 (0.60:1.76) | 0.928   | 0.02 (0.36) | 6.25         | 8.0e-04 | 0.76 (0.17:3.80) | 0.732 |
| NESDA                                                                   | 37,435                   | 1143     | 272     | 1.23 (1.08:1.41) | 0.002   | 1.26 (0.82) | 3.29         | 3.7e-21 | 1.38 (1.07:1.76) | 0.011 |
| RADIANT UK                                                              | 36,909                   | 269      | 267     | 1.32 (1.10:1.58) | 0.003   | 2.07 (1.33) | 4.03         | 3.0e-20 | 0.67 (0.51:0.90) | 0.006 |
| SHIP-0                                                                  | 39,406                   | 340      | 993     | 1.08 (0.95:1.22) | 0.246   | 0.16 (0.28) | 1.52         | 7.0e-11 | 1.03 (0.91:1.17) | 0.628 |
| SHIP-TREND                                                              | 40,084                   | 149      | 448     | 1.32 (1.08:1.62) | 0.006   | 1.98 (1.43) | 1.71         | 3.7e-07 | 1.00 (0.79:1.27) | 0.987 |
| Total                                                                   | -                        | 1957     | 2002    | 1.20 (1.10:1.31) | 2.8e-05 | 0.66 (0.28) | 2.53         | 1.3e-09 | 1.00 (0.79:1.26) | 0.972 |

**Table S9.** Polygenic risk scores analyses with simulated data

| Cohort                        | Mean polygenic risk scores (SE) |              |               |               | Case-control PRS difference |      | PRSxCT Interaction-effect |       |
|-------------------------------|---------------------------------|--------------|---------------|---------------|-----------------------------|------|---------------------------|-------|
|                               | Cases                           |              | Controls      |               | CT=0                        | CT=1 | OR                        | P     |
|                               | CT=0                            | CT=1         | CT=0          | CT=1          |                             |      |                           |       |
| Model 1 ("additive")          | 0.32 (0.007)                    | 0.17 (0.008) | -0.24 (0.003) | -0.30 (0.008) | 0.57                        | 0.47 | 0.91                      | 0.157 |
| Model 2 ("interaction")       | 0.24 (0.006)                    | 0.03 (0.004) | -0.14 (0.003) | -0.16 (0.011) | 0.38                        | 0.19 | 0.83                      | 0.013 |
| Model 3 (h2I_CT=0.5)          | 0.26 (0.004)                    | 0.27 (0.005) | -0.29 (0.003) | -0.18 (0.014) | 0.55                        | 0.45 | 0.90                      | 0.185 |
| Model 4 (increased G in CT=1) | 0.24 (0.007)                    | 0.24 (0.007) | -0.22 (0.004) | -0.32 (0.010) | 0.46                        | 0.56 | 1.15                      | 0.099 |
| Model 5 (decreased E in CT=1) | 0.30 (0.005)                    | 0.27 (0.006) | -0.26 (0.004) | -0.38 (0.010) | 0.55                        | 0.65 | 1.16                      | 0.047 |

Simulated data of 10,000 SNPs were based on five models, all assuming heritability of MDD of 0.35, prevalence of MDD of 0.15, prevalence of CT of 0.25 and an odds ratio (OR) of CT on MDD of 3.2 (see Supplemental Methods). Model 1: SNP-effects are the same in exposed and unexposed; Model 2: correlation of 0 between SNP-effects in exposed and unexposed; Model 3: SNP-effects on MDD are the same in exposed and unexposed, heritability of CT of 0.5 (for Models 1,2,4, and 5, heritability of CT was set at 0); Models 4: same direction of SNP-effects in exposed and unexposed (correlation of 1), but 3 times larger variance of effects in exposed than unexposed; Model 5: SNP-effects the same in exposed and unexposed, but three times smaller environmental variance in exposed. Simulation was repeated ten times, the means of which are displayed with the standard error (SE) between brackets.

**Supplemental References**

1. Rasch G (1960): *Studies in mathematical psychology: I. Probabilistic models for some intelligence and attainment tests.* .
2. Sartor CE, Grant JD, Lynskey MT, McCutcheon V V, Waldron M, Statham DJ, *et al.* (2012): Common heritable contributions to low-risk trauma, high-risk trauma, posttraumatic stress disorder, and major depression. *Arch Gen Psychiatry.* 69: 293–9.
3. Golan D, Lander ES, Rosset S (2014): Measuring missing heritability: Inferring the contribution of common variants. *Proc Natl Acad Sci U S A.* 111: E5272-81.
4. Purcell S, Neale B, Todd-Brown K, Thomas L, Ferreira MAR, Bender D, *et al.* (2007): PLINK: a tool set for whole-genome association and population-based linkage analyses. *Am J Hum Genet.* 81: 559–75.
5. Witte JS, Visscher PM, Wray NR (2014): The contribution of genetic variants to disease depends on the ruler. *Nat Rev Genet.* 15: 765–76.
